# Supplementary material for: Is this how bromine spiropyran salt is converted to merocyanine under UV irradiation? A look through the prism of quantum chemical calculations
Source: Royal Society of Chemistry journal article supplement (doi:10.1039/d3cp06322d), 2024-01-01
Supplement: d3cp06322d1.pdf [file d3cp06322d1.pdf]

## Is this how bromine spiropyran salt is converted to merocyanine under UV irradiation? A look through the prism of quantum chemical calculations

Arthur R. Tulyabaev, Artur A. Khuzin, Timur I. Lukmanov, and Denis Sh. Sabirov

### Supplementary information

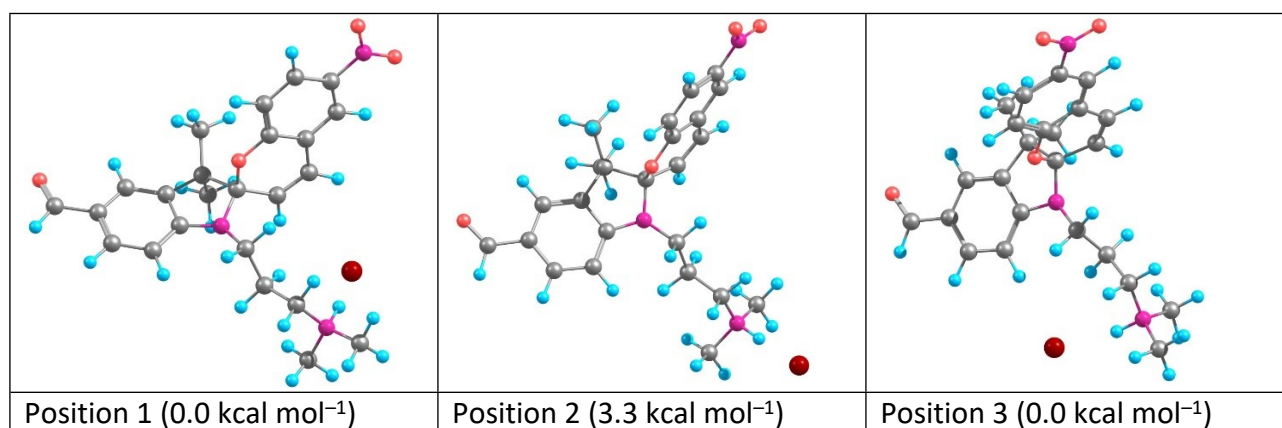

Fig. 1. Position of bromine ion relative to  $\text{NH}^+(\text{CH}_3)_2$  group of propyl fragment.

Cartesian coordinates of spiropyran and merocyanine forms

Spiropyran

|   |              |              |              |
|---|--------------|--------------|--------------|
| 6 | 0.509669000  | 3.832646000  | 0.301942000  |
| 6 | 0.179824000  | 2.534312000  | 0.602612000  |
| 6 | 1.708085000  | 4.083715000  | -0.396519000 |
| 6 | 1.028761000  | 1.477322000  | 0.219344000  |
| 6 | 2.542090000  | 3.025138000  | -0.763820000 |
| 1 | 3.461867000  | 3.239409000  | -1.303769000 |
| 6 | 2.222214000  | 1.700921000  | -0.464013000 |
| 1 | 2.880378000  | 0.888125000  | -0.764313000 |
| 1 | -0.125879000 | 4.669304000  | 0.581572000  |
| 6 | -0.985239000 | 1.957968000  | 1.380274000  |
| 6 | -0.917810000 | 0.458883000  | 0.922185000  |
| 7 | 0.483422000  | 0.266461000  | 0.623461000  |
| 6 | -0.681408000 | 2.071955000  | 2.883378000  |
| 1 | -0.590376000 | 3.128815000  | 3.150024000  |
| 1 | -1.488084000 | 1.633591000  | 3.480018000  |
| 1 | 0.258738000  | 1.572539000  | 3.138893000  |
| 6 | -2.335856000 | 2.596791000  | 1.071731000  |
| 1 | -2.351111000 | 3.624592000  | 1.447446000  |
| 1 | -2.536292000 | 2.618949000  | -0.001893000 |
| 1 | -3.142542000 | 2.048740000  | 1.572886000  |
| 6 | -1.433018000 | -0.533063000 | 1.925118000  |
| 6 | -2.612273000 | -1.142955000 | 1.785918000  |
| 6 | -3.427574000 | -0.914742000 | 0.597320000  |
| 6 | -4.706665000 | -1.433020000 | 0.432523000  |
| 6 | -2.854049000 | -0.167481000 | -0.446962000 |
| 1 | -5.172311000 | -2.018079000 | 1.217618000  |
| 6 | -5.384481000 | -1.196475000 | -0.756892000 |

|    |              |              |              |
|----|--------------|--------------|--------------|
| 6  | -3.542674000 | 0.047265000  | -1.642923000 |
| 1  | -3.064969000 | 0.621073000  | -2.428952000 |
| 6  | -4.819731000 | -0.466298000 | -1.800001000 |
| 1  | -5.380023000 | -0.305215000 | -2.712523000 |
| 8  | -1.608773000 | 0.336951000  | -0.353111000 |
| 1  | -0.804891000 | -0.700833000 | 2.794103000  |
| 1  | -2.980789000 | -1.831472000 | 2.540770000  |
| 7  | -6.727703000 | -1.738461000 | -0.920442000 |
| 8  | -7.311360000 | -1.519287000 | -1.969743000 |
| 8  | -7.201878000 | -2.385292000 | -0.000014000 |
| 6  | 2.087449000  | 5.459192000  | -0.743088000 |
| 8  | 1.432406000  | 6.446858000  | -0.469079000 |
| 1  | 3.046136000  | 5.556282000  | -1.291794000 |
| 6  | 0.957199000  | -1.001321000 | 0.097420000  |
| 1  | 0.110625000  | -1.696120000 | 0.075500000  |
| 1  | 1.306685000  | -0.872605000 | -0.936724000 |
| 6  | 2.096414000  | -1.569758000 | 0.944046000  |
| 1  | 1.768520000  | -1.660035000 | 1.984314000  |
| 1  | 2.935937000  | -0.864752000 | 0.909365000  |
| 7  | 3.976601000  | -3.199630000 | 0.700510000  |
| 1  | 4.492397000  | -2.393453000 | 0.264502000  |
| 6  | 4.246917000  | -3.273608000 | 2.158162000  |
| 1  | 3.947334000  | -2.337011000 | 2.626419000  |
| 1  | 3.676960000  | -4.105088000 | 2.576670000  |
| 1  | 5.314064000  | -3.436054000 | 2.305933000  |
| 6  | 4.452405000  | -4.408915000 | -0.021316000 |
| 1  | 3.837153000  | -5.261744000 | 0.268504000  |
| 1  | 4.368068000  | -4.207543000 | -1.089788000 |
| 1  | 5.495252000  | -4.586080000 | 0.241427000  |
| 35 | 4.698581000  | -1.096011000 | -1.519502000 |
| 6  | 2.542437000  | -2.913777000 | 0.380338000  |
| 1  | 1.946607000  | -3.749536000 | 0.757848000  |
| 1  | 2.494690000  | -2.896024000 | -0.711283000 |

CCC

|   |              |              |              |
|---|--------------|--------------|--------------|
| 6 | -4.102579000 | -1.972789000 | -0.144720000 |
| 6 | -2.809570000 | -1.798235000 | 0.301568000  |
| 6 | -4.682477000 | -0.949101000 | -0.909465000 |
| 6 | -2.124397000 | -0.621420000 | -0.005933000 |
| 6 | -3.973643000 | 0.217854000  | -1.207487000 |
| 1 | -4.449831000 | 0.992277000  | -1.803296000 |
| 6 | -2.668088000 | 0.410571000  | -0.756486000 |
| 1 | -2.121253000 | 1.321921000  | -0.992007000 |
| 1 | -4.677017000 | -2.869809000 | 0.070468000  |
| 6 | -1.905415000 | -2.687473000 | 1.116120000  |
| 6 | -0.638276000 | -1.850329000 | 1.174361000  |
| 7 | -0.832198000 | -0.691103000 | 0.572462000  |
| 6 | -2.477432000 | -2.939389000 | 2.522594000  |
| 1 | -3.431387000 | -3.465823000 | 2.428552000  |

|    |              |              |              |
|----|--------------|--------------|--------------|
| 1  | -1.801847000 | -3.565889000 | 3.111246000  |
| 1  | -2.650814000 | -2.000177000 | 3.054991000  |
| 6  | -1.600455000 | -4.013844000 | 0.398987000  |
| 1  | -2.530087000 | -4.574800000 | 0.265049000  |
| 1  | -1.143059000 | -3.824859000 | -0.574795000 |
| 1  | -0.911148000 | -4.613443000 | 1.000840000  |
| 6  | 0.531400000  | -2.290929000 | 1.862769000  |
| 6  | 1.858925000  | -2.191834000 | 1.544615000  |
| 6  | 2.543535000  | -1.820054000 | 0.341099000  |
| 6  | 1.885890000  | -1.768645000 | -0.968277000 |
| 6  | 3.930240000  | -1.619089000 | 0.431441000  |
| 6  | 2.740398000  | -1.432966000 | -2.096616000 |
| 6  | 4.675844000  | -1.294638000 | -0.681947000 |
| 6  | 4.072883000  | -1.193789000 | -1.963440000 |
| 1  | 4.690096000  | -0.935414000 | -2.816124000 |
| 1  | 0.301385000  | -2.854837000 | 2.764331000  |
| 1  | 2.524627000  | -2.530170000 | 2.338744000  |
| 6  | -6.066399000 | -1.104271000 | -1.410752000 |
| 8  | -6.757939000 | -2.076108000 | -1.193891000 |
| 1  | -6.448704000 | -0.257217000 | -2.012382000 |
| 6  | 0.102967000  | 0.425658000  | 0.498102000  |
| 1  | 0.124270000  | 0.787433000  | -0.535790000 |
| 1  | 1.094914000  | 0.058546000  | 0.754845000  |
| 6  | -0.318228000 | 1.559466000  | 1.434692000  |
| 1  | -0.461604000 | 1.173603000  | 2.448297000  |
| 1  | -1.271732000 | 1.972294000  | 1.086863000  |
| 7  | 0.164626000  | 4.013811000  | 1.518313000  |
| 1  | -0.507074000 | 4.063212000  | 0.713135000  |
| 6  | -0.532851000 | 4.237247000  | 2.810144000  |
| 1  | -1.295429000 | 3.471341000  | 2.945017000  |
| 1  | 0.202430000  | 4.183260000  | 3.614701000  |
| 1  | -0.997754000 | 5.222433000  | 2.789109000  |
| 6  | 1.186648000  | 5.060251000  | 1.245056000  |
| 1  | 2.011356000  | 4.943216000  | 1.949062000  |
| 1  | 1.524006000  | 4.928435000  | 0.216436000  |
| 1  | 0.722678000  | 6.039113000  | 1.362647000  |
| 35 | -0.746051000 | 3.559275000  | -1.463377000 |
| 6  | 0.758314000  | 2.645164000  | 1.401561000  |
| 1  | 1.492130000  | 2.532163000  | 2.203555000  |
| 1  | 1.271119000  | 2.639886000  | 0.436873000  |
| 1  | 4.427559000  | -1.701743000 | 1.392940000  |
| 8  | 0.670381000  | -2.005247000 | -1.126756000 |
| 1  | 2.256550000  | -1.374051000 | -3.066253000 |
| 7  | 6.086708000  | -1.065260000 | -0.543396000 |
| 8  | 6.596084000  | -1.167310000 | 0.568963000  |
| 8  | 6.730229000  | -0.774105000 | -1.546871000 |

CCT

|   |             |              |             |
|---|-------------|--------------|-------------|
| 6 | 4.550831000 | -1.118053000 | 0.347740000 |
|---|-------------|--------------|-------------|

|   |              |              |              |
|---|--------------|--------------|--------------|
| 6 | 3.272176000  | -0.663353000 | 0.590380000  |
| 6 | 4.864317000  | -1.562130000 | -0.944565000 |
| 6 | 2.322101000  | -0.660467000 | -0.432746000 |
| 6 | 3.902990000  | -1.548520000 | -1.957337000 |
| 1 | 4.170870000  | -1.896086000 | -2.951403000 |
| 6 | 2.606094000  | -1.097212000 | -1.719648000 |
| 1 | 1.876092000  | -1.092556000 | -2.519834000 |
| 1 | 5.314761000  | -1.139879000 | 1.120560000  |
| 6 | 2.638821000  | -0.137235000 | 1.850370000  |
| 6 | 1.232847000  | 0.200693000  | 1.368464000  |
| 7 | 1.096626000  | -0.157936000 | 0.081643000  |
| 6 | 2.605844000  | -1.222473000 | 2.942646000  |
| 1 | 3.632094000  | -1.519159000 | 3.176709000  |
| 1 | 2.146622000  | -0.841632000 | 3.858818000  |
| 1 | 2.055793000  | -2.105577000 | 2.606758000  |
| 6 | 3.337353000  | 1.132239000  | 2.364566000  |
| 1 | 4.362754000  | 0.888600000  | 2.657507000  |
| 1 | 3.370949000  | 1.904985000  | 1.591200000  |
| 1 | 2.810362000  | 1.528667000  | 3.237303000  |
| 6 | 0.265963000  | 0.708441000  | 2.260031000  |
| 6 | -0.894507000 | 1.426465000  | 2.034208000  |
| 6 | -1.229265000 | 2.286456000  | 0.960014000  |
| 6 | -0.241055000 | 2.937088000  | 0.193447000  |
| 6 | -2.651648000 | 2.602871000  | 0.764882000  |
| 1 | 0.812327000  | 2.737106000  | 0.367962000  |
| 6 | -0.604091000 | 3.878539000  | -0.737908000 |
| 6 | -2.947412000 | 3.630145000  | -0.221394000 |
| 1 | -3.991580000 | 3.885853000  | -0.368170000 |
| 6 | -1.968473000 | 4.230693000  | -0.948716000 |
| 1 | -2.199496000 | 4.987141000  | -1.689981000 |
| 8 | -3.548156000 | 1.979051000  | 1.364888000  |
| 1 | 0.473028000  | 0.456784000  | 3.297718000  |
| 1 | -1.638250000 | 1.397273000  | 2.831781000  |
| 7 | 0.422599000  | 4.560351000  | -1.486792000 |
| 8 | 0.076826000  | 5.416482000  | -2.291494000 |
| 8 | 1.592761000  | 4.253156000  | -1.291944000 |
| 6 | 6.228476000  | -2.054530000 | -1.242354000 |
| 8 | 7.120632000  | -2.103690000 | -0.423735000 |
| 1 | 6.393841000  | -2.387552000 | -2.285033000 |
| 6 | -0.137558000 | -0.183821000 | -0.704199000 |
| 1 | -0.487918000 | 0.844518000  | -0.833849000 |
| 1 | 0.116047000  | -0.564337000 | -1.692010000 |
| 6 | -1.226280000 | -1.055775000 | -0.066753000 |
| 1 | -1.208952000 | -0.922336000 | 1.014876000  |
| 1 | -1.051173000 | -2.114211000 | -0.281089000 |
| 7 | -3.742378000 | -1.300001000 | 0.022590000  |
| 1 | -3.685909000 | -2.317406000 | -0.275995000 |
| 6 | -3.693929000 | -1.284268000 | 1.509502000  |
| 1 | -2.908794000 | -1.963549000 | 1.840455000  |

|    |              |              |              |
|----|--------------|--------------|--------------|
| 1  | -3.514542000 | -0.257105000 | 1.838938000  |
| 1  | -4.654271000 | -1.642371000 | 1.880756000  |
| 6  | -5.009343000 | -0.702989000 | -0.473335000 |
| 1  | -5.066145000 | 0.322479000  | -0.100131000 |
| 1  | -5.001910000 | -0.716304000 | -1.563438000 |
| 1  | -5.844505000 | -1.295083000 | -0.099630000 |
| 35 | -3.004765000 | -4.244829000 | -0.752947000 |
| 6  | -2.576275000 | -0.623144000 | -0.623654000 |
| 1  | -2.729392000 | 0.449377000  | -0.482383000 |
| 1  | -2.648212000 | -0.853439000 | -1.690897000 |

TCT

|   |              |              |              |
|---|--------------|--------------|--------------|
| 6 | -4.219121000 | 0.057047000  | 0.268883000  |
| 6 | -3.065634000 | -0.350594000 | -0.368910000 |
| 6 | -4.214825000 | 1.308957000  | 0.898803000  |
| 6 | -1.941397000 | 0.475674000  | -0.363791000 |
| 6 | -3.084690000 | 2.130321000  | 0.866550000  |
| 1 | -3.120441000 | 3.104326000  | 1.347448000  |
| 6 | -1.912451000 | 1.731441000  | 0.224481000  |
| 1 | -1.051638000 | 2.395598000  | 0.176200000  |
| 1 | -5.119406000 | -0.550650000 | 0.290469000  |
| 6 | -2.754606000 | -1.592650000 | -1.160488000 |
| 6 | -1.318104000 | -1.335123000 | -1.570846000 |
| 7 | -0.904673000 | -0.174594000 | -1.098625000 |
| 6 | -2.833251000 | -2.868599000 | -0.300949000 |
| 1 | -3.875531000 | -3.039885000 | -0.017681000 |
| 1 | -2.481399000 | -3.732690000 | -0.872912000 |
| 1 | -2.238891000 | -2.773906000 | 0.612676000  |
| 6 | -3.657931000 | -1.719790000 | -2.402267000 |
| 1 | -4.697712000 | -1.791917000 | -2.072905000 |
| 1 | -3.559626000 | -0.849931000 | -3.057173000 |
| 1 | -3.415373000 | -2.625156000 | -2.964907000 |
| 6 | -0.584275000 | -2.187462000 | -2.479913000 |
| 6 | 0.703463000  | -2.573976000 | -2.336572000 |
| 6 | 1.462486000  | -2.484267000 | -1.102183000 |
| 6 | 2.843952000  | -2.026956000 | -1.191463000 |
| 6 | 0.897454000  | -2.843688000 | 0.110042000  |
| 6 | 3.591393000  | -2.048356000 | 0.051596000  |
| 6 | 1.651985000  | -2.782285000 | 1.279618000  |
| 6 | 3.011783000  | -2.396870000 | 1.241253000  |
| 1 | 3.577518000  | -2.385303000 | 2.166783000  |
| 1 | -1.156724000 | -2.513568000 | -3.345616000 |
| 1 | 1.199449000  | -3.037142000 | -3.188312000 |
| 6 | -5.435788000 | 1.780532000  | 1.596374000  |
| 8 | -6.460289000 | 1.137831000  | 1.663075000  |
| 1 | -5.357164000 | 2.780008000  | 2.064658000  |
| 6 | 0.373109000  | 0.497829000  | -1.364475000 |
| 1 | 0.888700000  | -0.059086000 | -2.150064000 |
| 1 | 0.128726000  | 1.501600000  | -1.732992000 |

|    |              |              |              |
|----|--------------|--------------|--------------|
| 6  | 1.249959000  | 0.640136000  | -0.118955000 |
| 1  | 1.393540000  | -0.321093000 | 0.376868000  |
| 1  | 0.760822000  | 1.320877000  | 0.584810000  |
| 7  | 3.187659000  | 2.057768000  | 0.546255000  |
| 1  | 2.454267000  | 2.773929000  | 0.762759000  |
| 6  | 3.513631000  | 1.251124000  | 1.751003000  |
| 1  | 2.614632000  | 0.743458000  | 2.099984000  |
| 1  | 4.274025000  | 0.517073000  | 1.479595000  |
| 1  | 3.888102000  | 1.920185000  | 2.525132000  |
| 6  | 4.362297000  | 2.826119000  | 0.052484000  |
| 1  | 5.093165000  | 2.129719000  | -0.360365000 |
| 1  | 4.003258000  | 3.517871000  | -0.710201000 |
| 1  | 4.793356000  | 3.379875000  | 0.886246000  |
| 35 | 0.931657000  | 4.140726000  | -0.241570000 |
| 6  | 2.581778000  | 1.247964000  | -0.556832000 |
| 1  | 3.306060000  | 0.492271000  | -0.873025000 |
| 1  | 2.420098000  | 1.958603000  | -1.370685000 |
| 1  | -0.121280000 | -3.213143000 | 0.157726000  |
| 8  | 3.306350000  | -1.576474000 | -2.262055000 |
| 1  | 4.635763000  | -1.751843000 | 0.006983000  |
| 7  | 1.048021000  | -3.153295000 | 2.519168000  |
| 8  | 1.732860000  | -3.127797000 | 3.538982000  |
| 8  | -0.140001000 | -3.476534000 | 2.525649000  |

CTC

|   |              |              |              |
|---|--------------|--------------|--------------|
| 6 | -5.390539000 | -0.617092000 | 0.149615000  |
| 6 | -4.035628000 | -0.793551000 | -0.025613000 |
| 6 | -5.912600000 | 0.682364000  | 0.046357000  |
| 6 | -3.220411000 | 0.305612000  | -0.306714000 |
| 6 | -5.080159000 | 1.769165000  | -0.229788000 |
| 1 | -5.510062000 | 2.764495000  | -0.302995000 |
| 6 | -3.707916000 | 1.601122000  | -0.412731000 |
| 1 | -3.068533000 | 2.451433000  | -0.622760000 |
| 1 | -6.060969000 | -1.445219000 | 0.364071000  |
| 6 | -3.181634000 | -2.035234000 | 0.021757000  |
| 6 | -1.790480000 | -1.467049000 | -0.243852000 |
| 7 | -1.888343000 | -0.139862000 | -0.456203000 |
| 6 | -3.235682000 | -2.707747000 | 1.403002000  |
| 1 | -4.258811000 | -3.039829000 | 1.602550000  |
| 1 | -2.576605000 | -3.579825000 | 1.430738000  |
| 1 | -2.934771000 | -2.012144000 | 2.191098000  |
| 6 | -3.576952000 | -3.030715000 | -1.083603000 |
| 1 | -4.605130000 | -3.363399000 | -0.913380000 |
| 1 | -3.519050000 | -2.566405000 | -2.071642000 |
| 1 | -2.924183000 | -3.907807000 | -1.065101000 |
| 6 | -0.668242000 | -2.299078000 | -0.256890000 |
| 6 | 0.668433000  | -1.923667000 | -0.195688000 |
| 6 | 1.796217000  | -2.764571000 | -0.178566000 |
| 6 | 3.056707000  | -2.143198000 | -0.023553000 |

|    |              |              |              |
|----|--------------|--------------|--------------|
| 6  | 1.715060000  | -4.232556000 | -0.303721000 |
| 1  | 3.117311000  | -1.062686000 | 0.062246000  |
| 6  | 4.207266000  | -2.883001000 | 0.018973000  |
| 6  | 2.991505000  | -4.944453000 | -0.248047000 |
| 1  | 2.942802000  | -6.024729000 | -0.337368000 |
| 6  | 4.178100000  | -4.306765000 | -0.096658000 |
| 1  | 5.114036000  | -4.852329000 | -0.059340000 |
| 8  | 0.646738000  | -4.843550000 | -0.448451000 |
| 1  | -0.876333000 | -3.361755000 | -0.236567000 |
| 1  | 0.912824000  | -0.870076000 | -0.094532000 |
| 7  | 5.469854000  | -2.209883000 | 0.184771000  |
| 8  | 6.488835000  | -2.889733000 | 0.195679000  |
| 8  | 5.475363000  | -0.989640000 | 0.309711000  |
| 6  | -7.362650000 | 0.907869000  | 0.233443000  |
| 8  | -8.157367000 | 0.025048000  | 0.475428000  |
| 1  | -7.693932000 | 1.959900000  | 0.137010000  |
| 6  | -0.826215000 | 0.768363000  | -0.866315000 |
| 1  | -0.109220000 | 0.195884000  | -1.459668000 |
| 1  | -1.271186000 | 1.508919000  | -1.536760000 |
| 6  | -0.165701000 | 1.458992000  | 0.331000000  |
| 1  | 0.173387000  | 0.704684000  | 1.049594000  |
| 1  | -0.914827000 | 2.073524000  | 0.840716000  |
| 7  | 1.805682000  | 2.926312000  | 0.938846000  |
| 1  | 2.370296000  | 3.679008000  | 0.435104000  |
| 6  | 2.733062000  | 1.971978000  | 1.596834000  |
| 1  | 2.163330000  | 1.171175000  | 2.071291000  |
| 1  | 3.409659000  | 1.563973000  | 0.845234000  |
| 1  | 3.304316000  | 2.513147000  | 2.351096000  |
| 6  | 0.985487000  | 3.687573000  | 1.916516000  |
| 1  | 1.662238000  | 4.271905000  | 2.539858000  |
| 1  | 0.332251000  | 4.360715000  | 1.359839000  |
| 1  | 0.407986000  | 2.997747000  | 2.532316000  |
| 35 | 2.677483000  | 5.388685000  | -0.715197000 |
| 6  | 0.993476000  | 2.316137000  | -0.158798000 |
| 1  | 1.692181000  | 1.732270000  | -0.766386000 |
| 1  | 0.647182000  | 3.157508000  | -0.766971000 |

CTT

|   |              |              |              |
|---|--------------|--------------|--------------|
| 6 | -5.303350000 | -0.860897000 | 0.070281000  |
| 6 | -3.934728000 | -0.875104000 | -0.087880000 |
| 6 | -5.976752000 | 0.364607000  | -0.056721000 |
| 6 | -3.254595000 | 0.311152000  | -0.374167000 |
| 6 | -5.277711000 | 1.540796000  | -0.337058000 |
| 1 | -5.822450000 | 2.477094000  | -0.425018000 |
| 6 | -3.892995000 | 1.537170000  | -0.500690000 |
| 1 | -3.356947000 | 2.456591000  | -0.708033000 |
| 1 | -5.871758000 | -1.760254000 | 0.291537000  |
| 6 | -2.936628000 | -2.002910000 | -0.009820000 |
| 6 | -1.619679000 | -1.268926000 | -0.250875000 |

|    |              |              |              |
|----|--------------|--------------|--------------|
| 7  | -1.876506000 | 0.031274000  | -0.496332000 |
| 6  | -2.944840000 | -2.674371000 | 1.372572000  |
| 1  | -3.922671000 | -3.133723000 | 1.543805000  |
| 1  | -2.183867000 | -3.457971000 | 1.426414000  |
| 1  | -2.757610000 | -1.945465000 | 2.165473000  |
| 6  | -3.178710000 | -3.041343000 | -1.120935000 |
| 1  | -4.164332000 | -3.493923000 | -0.978901000 |
| 1  | -3.146925000 | -2.575494000 | -2.109466000 |
| 1  | -2.427209000 | -3.834763000 | -1.078170000 |
| 6  | -0.396068000 | -1.940790000 | -0.207001000 |
| 6  | 0.874692000  | -1.381500000 | -0.188153000 |
| 6  | 2.115336000  | -2.032782000 | -0.124889000 |
| 6  | 2.264897000  | -3.437082000 | -0.102724000 |
| 6  | 3.301119000  | -1.155977000 | -0.082770000 |
| 1  | 1.402204000  | -4.093751000 | -0.135489000 |
| 6  | 3.515340000  | -3.988867000 | -0.036386000 |
| 6  | 4.592045000  | -1.829333000 | -0.013395000 |
| 1  | 5.474109000  | -1.198746000 | 0.018405000  |
| 6  | 4.694107000  | -3.181622000 | 0.008494000  |
| 1  | 5.658210000  | -3.674138000 | 0.060950000  |
| 8  | 3.212385000  | 0.084185000  | -0.106620000 |
| 1  | -0.489799000 | -3.019232000 | -0.116918000 |
| 1  | 0.990688000  | -0.304726000 | -0.183997000 |
| 7  | 3.650777000  | -5.427037000 | -0.008838000 |
| 8  | 2.636571000  | -6.112850000 | -0.041564000 |
| 8  | 4.779951000  | -5.896731000 | 0.047674000  |
| 6  | -7.445234000 | 0.414229000  | 0.114172000  |
| 8  | -8.127659000 | -0.554369000 | 0.371054000  |
| 1  | -7.902229000 | 1.414959000  | -0.008450000 |
| 6  | -0.916885000 | 1.061633000  | -0.872346000 |
| 1  | -0.152349000 | 0.592420000  | -1.497107000 |
| 1  | -1.438825000 | 1.781201000  | -1.507372000 |
| 6  | -0.316027000 | 1.757523000  | 0.354803000  |
| 1  | -0.046626000 | 1.005213000  | 1.104654000  |
| 1  | -1.079422000 | 2.402534000  | 0.801303000  |
| 7  | 1.589834000  | 3.256969000  | 1.063004000  |
| 1  | 2.322395000  | 3.853055000  | 0.572749000  |
| 6  | 2.263424000  | 2.335388000  | 2.014626000  |
| 1  | 1.509921000  | 1.811712000  | 2.605327000  |
| 1  | 2.862461000  | 1.622811000  | 1.444947000  |
| 1  | 2.894412000  | 2.932884000  | 2.673246000  |
| 6  | 0.724139000  | 4.247657000  | 1.751129000  |
| 1  | 1.349197000  | 4.823713000  | 2.433861000  |
| 1  | 0.301161000  | 4.913811000  | 0.998244000  |
| 1  | -0.060071000 | 3.733375000  | 2.306781000  |
| 35 | 3.057374000  | 5.357817000  | -0.685161000 |
| 6  | 0.909704000  | 2.555251000  | -0.067773000 |
| 1  | 1.667397000  | 1.898086000  | -0.508489000 |
| 1  | 0.660518000  | 3.335406000  | -0.793807000 |



## TTC

|   |              |              |              |
|---|--------------|--------------|--------------|
| 6 | 1.230827000  | 4.976923000  | 0.193737000  |
| 6 | 0.811420000  | 3.689175000  | -0.057128000 |
| 6 | 2.602651000  | 5.261790000  | 0.101064000  |
| 6 | 1.744243000  | 2.705174000  | -0.398173000 |
| 6 | 3.520026000  | 4.263099000  | -0.233460000 |
| 1 | 4.577018000  | 4.508844000  | -0.292241000 |
| 6 | 3.106676000  | 2.956852000  | -0.489448000 |
| 1 | 3.826665000  | 2.185923000  | -0.739296000 |
| 1 | 0.539724000  | 5.772444000  | 0.460585000  |
| 6 | -0.573675000 | 3.080525000  | -0.030921000 |
| 6 | -0.267321000 | 1.629515000  | -0.392932000 |
| 7 | 1.057668000  | 1.495598000  | -0.608153000 |
| 6 | -1.178838000 | 3.203562000  | 1.379140000  |
| 1 | -1.261562000 | 4.262939000  | 1.639127000  |
| 1 | -2.175681000 | 2.760275000  | 1.429105000  |
| 1 | -0.540984000 | 2.713890000  | 2.120007000  |
| 6 | -1.467746000 | 3.745923000  | -1.094383000 |
| 1 | -1.550936000 | 4.813266000  | -0.870176000 |
| 1 | -1.034925000 | 3.634053000  | -2.091933000 |
| 1 | -2.473132000 | 3.319590000  | -1.100021000 |
| 6 | -1.123477000 | 0.532585000  | -0.477712000 |
| 6 | -2.493390000 | 0.574240000  | -0.260458000 |
| 6 | -3.353931000 | -0.539372000 | -0.205207000 |
| 6 | -4.738233000 | -0.286674000 | -0.060852000 |
| 6 | -2.866607000 | -1.931808000 | -0.255660000 |
| 1 | -5.097062000 | 0.736558000  | -0.007199000 |
| 6 | -5.637349000 | -1.317219000 | 0.003734000  |
| 6 | -3.893653000 | -2.965952000 | -0.183718000 |
| 1 | -3.545489000 | -3.992583000 | -0.230236000 |
| 6 | -5.213555000 | -2.677818000 | -0.060975000 |
| 1 | -5.961796000 | -3.460141000 | -0.005951000 |
| 8 | -1.663074000 | -2.237166000 | -0.339196000 |
| 1 | -0.704177000 | -0.440320000 | -0.686832000 |
| 1 | -2.975969000 | 1.538915000  | -0.118760000 |
| 7 | -7.042391000 | -1.023338000 | 0.143888000  |
| 8 | -7.396632000 | 0.148570000  | 0.191766000  |
| 8 | -7.823700000 | -1.964642000 | 0.208802000  |
| 6 | 3.086381000  | 6.633836000  | 0.365154000  |
| 8 | 2.363147000  | 7.559507000  | 0.665423000  |
| 1 | 4.180287000  | 6.775572000  | 0.270489000  |
| 6 | 1.704978000  | 0.245697000  | -0.992925000 |
| 1 | 1.109872000  | -0.208770000 | -1.790462000 |
| 1 | 2.678240000  | 0.492892000  | -1.421017000 |
| 6 | 1.854204000  | -0.713665000 | 0.191055000  |
| 1 | 0.864560000  | -0.911124000 | 0.617198000  |
| 1 | 2.462832000  | -0.237495000 | 0.966074000  |
| 7 | 2.327776000  | -3.149154000 | 0.662623000  |

|    |             |              |              |
|----|-------------|--------------|--------------|
| 1  | 3.012255000 | -3.877258000 | 0.296882000  |
| 6  | 0.954592000 | -3.716760000 | 0.665101000  |
| 1  | 0.237552000 | -2.977082000 | 1.021527000  |
| 1  | 0.693438000 | -4.002177000 | -0.353715000 |
| 1  | 0.950254000 | -4.593630000 | 1.312733000  |
| 6  | 2.819316000 | -2.837744000 | 2.029112000  |
| 1  | 2.821203000 | -3.761333000 | 2.608022000  |
| 1  | 3.838584000 | -2.458515000 | 1.944948000  |
| 1  | 2.164048000 | -2.102868000 | 2.497546000  |
| 35 | 4.878302000 | -4.645097000 | -0.276562000 |
| 6  | 2.497180000 | -2.008485000 | -0.288743000 |
| 1  | 2.061080000 | -2.341384000 | -1.235420000 |
| 1  | 3.575912000 | -1.904383000 | -0.436582000 |

TTT

|   |              |              |              |
|---|--------------|--------------|--------------|
| 6 | 5.315055000  | -0.192379000 | 0.168542000  |
| 6 | 3.976244000  | 0.016244000  | -0.078028000 |
| 6 | 5.814511000  | -1.502016000 | 0.080822000  |
| 6 | 3.151059000  | -1.061711000 | -0.413124000 |
| 6 | 4.972448000  | -2.567318000 | -0.246015000 |
| 1 | 5.382966000  | -3.571940000 | -0.303294000 |
| 6 | 3.616331000  | -2.367422000 | -0.499385000 |
| 1 | 2.970350000  | -3.202453000 | -0.745079000 |
| 1 | 5.991222000  | 0.617702000  | 0.429411000  |
| 6 | 3.155964000  | 1.288268000  | -0.045321000 |
| 6 | 1.769611000  | 0.756133000  | -0.406382000 |
| 7 | 1.848558000  | -0.577519000 | -0.622045000 |
| 6 | 3.188707000  | 1.895203000  | 1.369350000  |
| 1 | 4.225977000  | 2.120743000  | 1.633477000  |
| 1 | 2.613917000  | 2.822002000  | 1.424709000  |
| 1 | 2.790144000  | 1.190510000  | 2.104135000  |
| 6 | 3.670146000  | 2.283049000  | -1.102812000 |
| 1 | 4.709225000  | 2.537644000  | -0.874932000 |
| 1 | 3.632914000  | 1.841594000  | -2.102350000 |
| 1 | 3.086067000  | 3.205881000  | -1.106109000 |
| 6 | 0.565197000  | 1.443164000  | -0.493223000 |
| 6 | 0.408628000  | 2.804381000  | -0.246164000 |
| 6 | -0.803551000 | 3.499524000  | -0.169654000 |
| 6 | -2.060659000 | 2.853911000  | -0.226646000 |
| 6 | -0.729643000 | 4.961151000  | 0.047969000  |
| 1 | -2.135074000 | 1.780722000  | -0.363515000 |
| 6 | -3.212551000 | 3.574326000  | -0.081826000 |
| 6 | -2.014779000 | 5.652573000  | 0.173999000  |
| 1 | -1.977447000 | 6.725997000  | 0.327035000  |
| 6 | -3.196210000 | 4.993966000  | 0.112378000  |
| 1 | -4.141577000 | 5.514185000  | 0.214761000  |
| 8 | 0.345924000  | 5.564517000  | 0.118911000  |
| 1 | -0.319467000 | 0.867226000  | -0.739492000 |
| 1 | 1.282937000  | 3.428052000  | -0.079988000 |

|    |              |              |              |
|----|--------------|--------------|--------------|
| 7  | -4.477652000 | 2.880851000  | -0.103351000 |
| 8  | -5.500716000 | 3.545960000  | -0.013666000 |
| 8  | -4.479003000 | 1.657668000  | -0.207861000 |
| 6  | 7.246632000  | -1.760037000 | 0.340509000  |
| 8  | 8.047806000  | -0.896630000 | 0.628709000  |
| 1  | 7.559230000  | -2.818808000 | 0.254810000  |
| 6  | 0.716700000  | -1.418217000 | -0.990891000 |
| 1  | 0.154135000  | -0.900417000 | -1.773124000 |
| 1  | 1.109035000  | -2.333248000 | -1.438421000 |
| 6  | -0.176760000 | -1.732764000 | 0.213619000  |
| 1  | -0.444171000 | -0.792763000 | 0.708409000  |
| 1  | 0.386303000  | -2.331892000 | 0.935802000  |
| 7  | -2.551890000 | -2.434441000 | 0.727799000  |
| 1  | -3.238366000 | -3.149271000 | 0.335022000  |
| 6  | -3.221848000 | -1.111832000 | 0.821468000  |
| 1  | -2.553575000 | -0.390077000 | 1.293716000  |
| 1  | -3.490572000 | -0.776205000 | -0.179963000 |
| 1  | -4.121583000 | -1.224831000 | 1.426564000  |
| 6  | -2.177656000 | -2.977381000 | 2.058427000  |
| 1  | -3.084107000 | -3.054806000 | 2.659008000  |
| 1  | -1.749862000 | -3.969873000 | 1.911709000  |
| 1  | -1.464208000 | -2.309176000 | 2.541906000  |
| 35 | -3.898716000 | -5.013628000 | -0.339869000 |
| 6  | -1.425337000 | -2.470450000 | -0.254720000 |
| 1  | -1.821522000 | -2.036074000 | -1.177549000 |
| 1  | -1.232449000 | -3.530020000 | -0.444154000 |
